# Supplementary material for: Addressing climate change with behavioral science: A global intervention tournament in 63 countries
Source: PubMed Central journal article supplement (PMC10849597; doi:10.1126/sciadv.adj5778), 2024-02-07
Supplement: sciadv.adj5778_sm.pdf [file sciadv.adj5778_sm.pdf]

Supplementary Materials for

**Addressing climate change with behavioral science: A global intervention  
tournament in 63 countries**

Madalina Vlasceanu *et al.*

Corresponding author: Madalina Vlasceanu, vlasceanu@nyu.edu; Kimberly C. Doell, kimberlycdoell@gmail.com

*Sci. Adv.* **10**, eadj5778 (2024)  
DOI: 10.1126/sciadv.adj5778

**This PDF file includes:**

Figs. S1 to S6  
Tables S1 to S25

Supplemental Figures and Tables

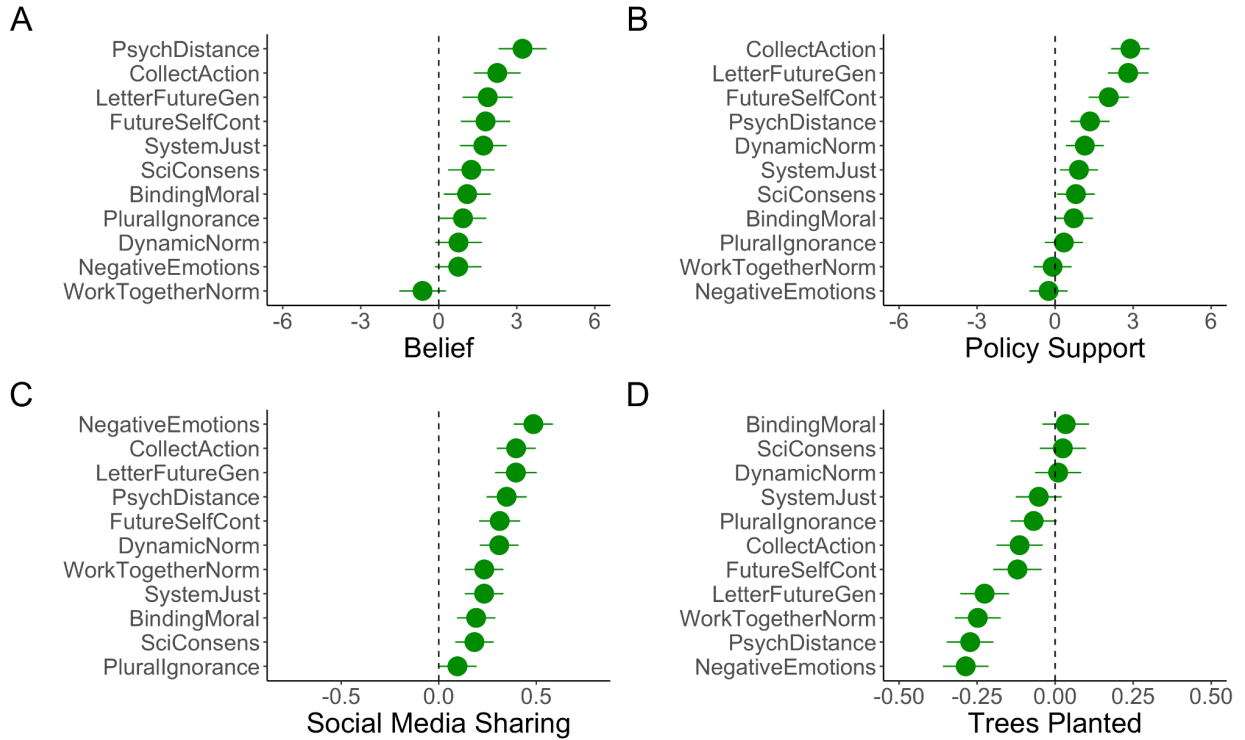

**fig. S1:** Coefficient estimates and 95% confidence intervals average treatment effects in the pre-registered analysis. A) Belief B) Policy Support C) Social Media Sharing D) Trees Planted (N=59,440 participants in 63 countries).

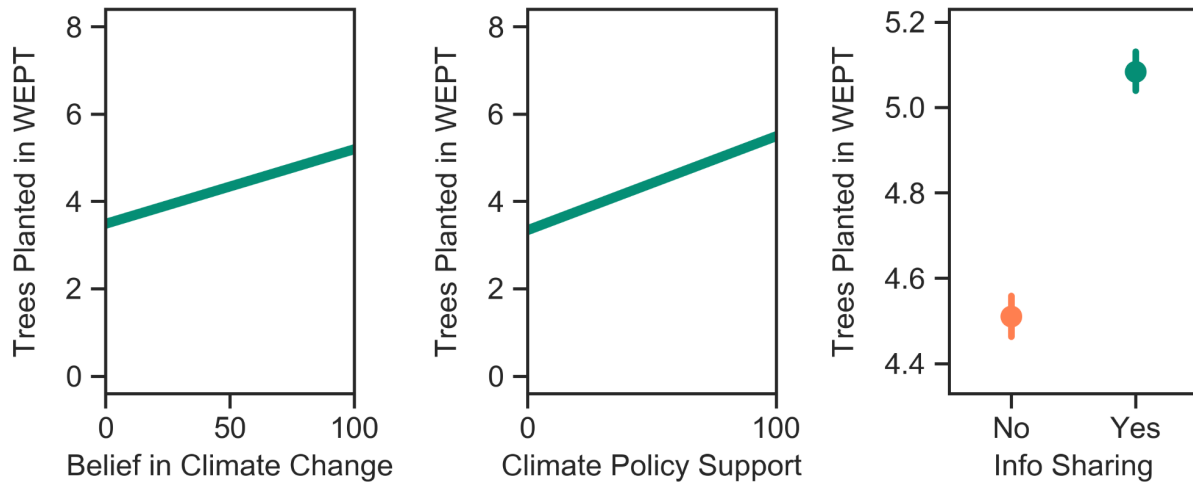

**fig. S2:** Number of trees planted in the WEPT as a function of belief in climate change, climate policy support, and willingness to share climate information. Statistics of the mixed models conducted are reported in tables S13-S18. The results reveal positive associations between the first three (lower effort behavioral) outcomes and the higher effort action (WEPT).

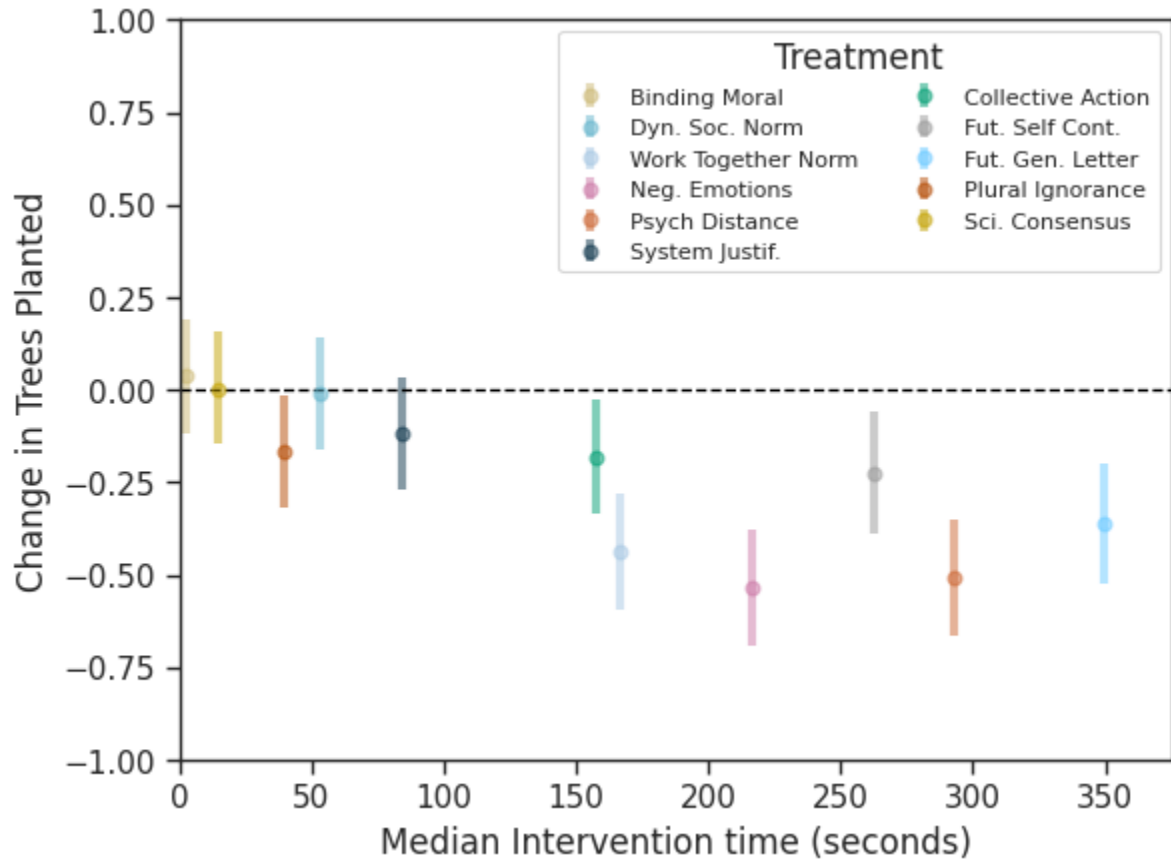

**fig. S3:** Average intervention effects for WEPT as a function of median intervention time.

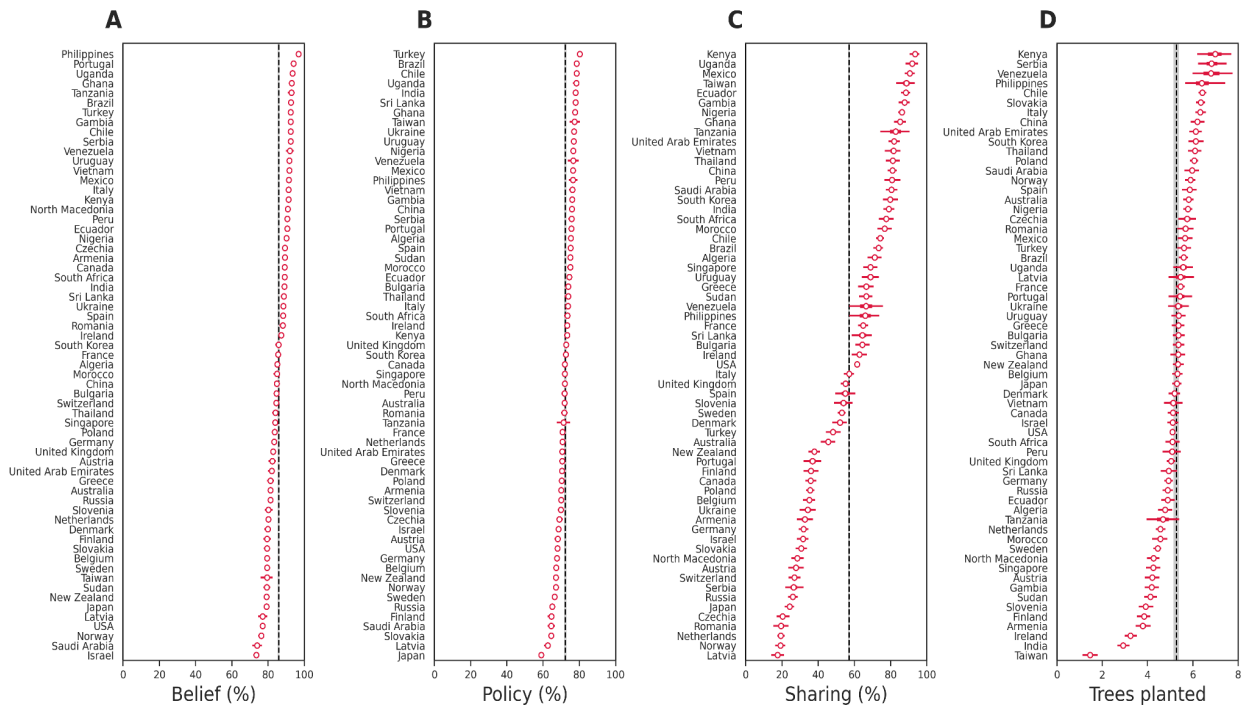

**fig. S4:** Country-level effects. Marginal, country-level posterior estimates for each of the key dependent variables. Dots indicate the mean, with error bars indicating the 94% credible region (C.R.). Thicker bars, when visible, indicate the interquartile range (IQR). Vertical lines and shading indicate the overall average across countries and 94% C.R., respectively. A) Belief, B) Support for Policy, C) Willingness to share climate-change information on social media, D) Number of trees planted in the WEPT task. Estimates shown in Tables S5-S8.

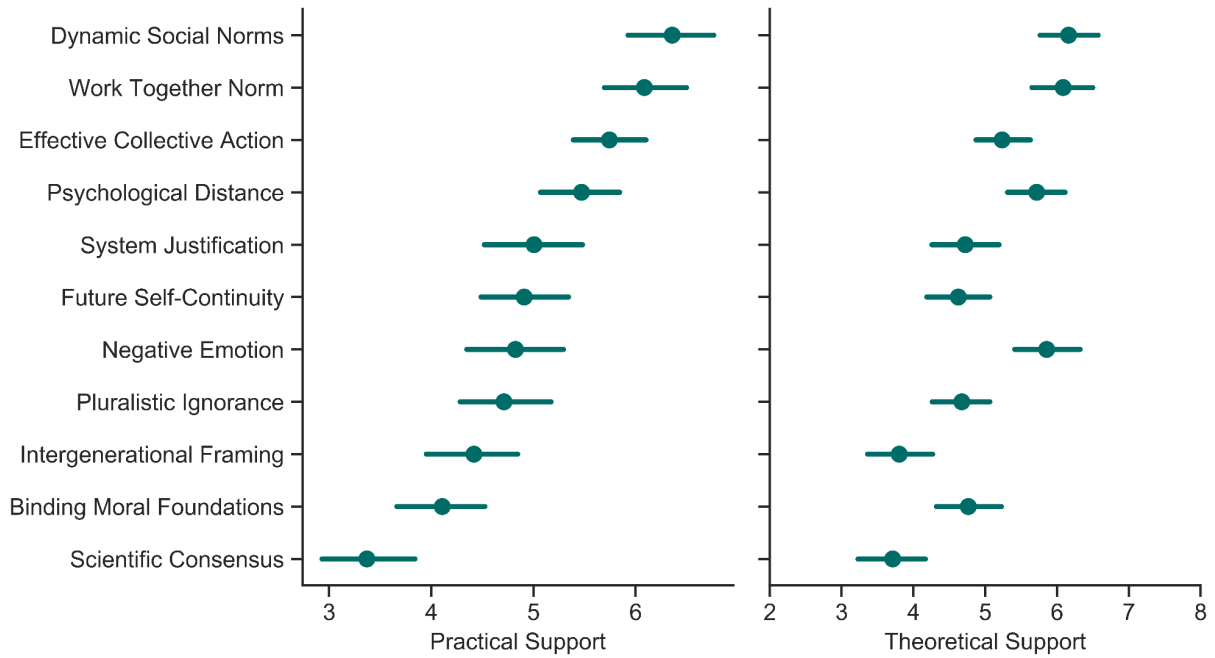

**fig. S5.** Average support of each crowdsourced intervention from a sample of 188 behavioral scientists (coauthors on the current paper) who were asked to rate the interventions on perceived efficiency (practical support) and theoretical value (theoretical support).

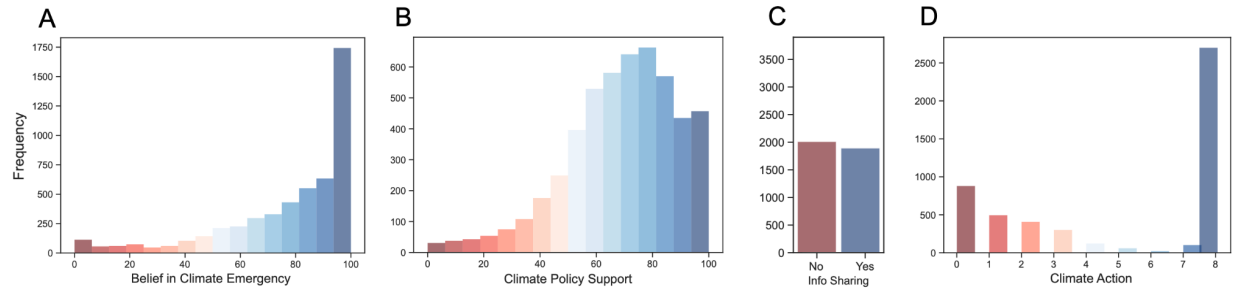

**fig. S6.** Frequency plots of A) belief, B) policy support, C) climate information sharing, and D) number of trees planted) in the control condition (N=5,086, from 63 countries), emphasizing the distributions of these dependent variables at baseline.

**Table S1.** Bayesian estimates of belief in climate change in each intervention, compared to the control condition.

| Intervention       | mean   | sd    | 1.5%   | 3%     | median | 97%   | 98.5%  |
|--------------------|--------|-------|--------|--------|--------|-------|--------|
| Psych Distance     | 2.255  | 0.332 | 1.524  | 1.619  | 2.263  | 2.865 | 2.954  |
| Collective Action  | 1.454  | 0.338 | 0.712  | 0.816  | 1.457  | 2.07  | 2.177  |
| Fut. Self Cont.    | 1.257  | 0.351 | 0.547  | 0.637  | 1.249  | 1.922 | 2.037  |
| Letter Fut. Gen.   | 1.206  | 0.341 | 0.471  | 0.553  | 1.203  | 1.863 | 1.952  |
| System Justif.     | 0.847  | 0.329 | 0.112  | 0.218  | 0.852  | 1.458 | 1.555  |
| Sci. Consensus     | 0.426  | 0.345 | -0.341 | -0.252 | 0.437  | 1.052 | 1.134  |
| Binding Moral      | 0.348  | 0.347 | -0.385 | -0.295 | 0.352  | 0.994 | 1.087  |
| Dyn. Soc. Norm     | 0.343  | 0.342 | -0.421 | -0.324 | 0.35   | 0.969 | 1.073  |
| Neg. Emotions      | 0.244  | 0.341 | -0.488 | -0.404 | 0.238  | 0.907 | 0.997  |
| Plural Ignorance   | -0.263 | 0.348 | -0.976 | -0.894 | -0.274 | 0.404 | 0.507  |
| Work Together Norm | -1.195 | 0.359 | -1.947 | -1.839 | -1.198 | -0.5  | -0.374 |



**Table S2.** Bayesian estimates of policy support in each intervention, compared to the control condition.

| Intervention       | mean  | sd    | 1.5%   | 3%     | median | 97%   | 98.5% |
|--------------------|-------|-------|--------|--------|--------|-------|-------|
| Letter Future Gen. | 2.552 | 0.318 | 1.847  | 1.95   | 2.55   | 3.155 | 3.236 |
| CollectAction      | 2.406 | 0.289 | 1.794  | 1.863  | 2.405  | 2.967 | 3.046 |
| FutureSelfCont     | 2.111 | 0.308 | 1.464  | 1.545  | 2.111  | 2.696 | 2.804 |
| PsychDistance      | 1.066 | 0.302 | 0.388  | 0.486  | 1.07   | 1.64  | 1.722 |
| DynamicNorm        | 0.93  | 0.294 | 0.295  | 0.385  | 0.927  | 1.492 | 1.581 |
| SystemJust         | 0.741 | 0.287 | 0.115  | 0.201  | 0.739  | 1.293 | 1.368 |
| BindingMoral       | 0.511 | 0.298 | -0.133 | -0.051 | 0.506  | 1.062 | 1.159 |
| SciConsens         | 0.471 | 0.309 | -0.226 | -0.098 | 0.468  | 1.041 | 1.135 |
| NegativeEmotions   | 0.148 | 0.296 | -0.501 | -0.411 | 0.152  | 0.708 | 0.797 |
| Work Together Norm | 0.145 | 0.3   | -0.485 | -0.396 | 0.142  | 0.711 | 0.795 |
| PluralIgnorance    | 0.096 | 0.299 | -0.557 | -0.463 | 0.094  | 0.666 | 0.737 |

**Table S3.** Bayesian estimates of sharing intentions in each intervention, compared to the control condition.

| Intervention       | mean   | sd    | 1.5%  | 3%    | median | 97%    | 98.5%  |
|--------------------|--------|-------|-------|-------|--------|--------|--------|
| Neg. Emotions      | 12.106 | 1.293 | 9.325 | 9.671 | 12.079 | 14.593 | 14.966 |
| Letter Fut. Gen.   | 10.754 | 1.419 | 7.817 | 8.099 | 10.749 | 13.535 | 13.893 |
| Collective Action  | 10.527 | 1.319 | 7.611 | 8.108 | 10.536 | 13.014 | 13.421 |
| Psych Distance     | 9.085  | 1.338 | 6.288 | 6.631 | 9.074  | 11.611 | 11.974 |
| Fut. Self Cont.    | 8.255  | 1.41  | 5.271 | 5.64  | 8.249  | 10.876 | 11.254 |
| Dyn. Soc. Norm     | 7.978  | 1.317 | 5.085 | 5.465 | 7.982  | 10.455 | 10.847 |
| Work Together Norm | 7.535  | 1.331 | 4.739 | 5.111 | 7.515  | 10.078 | 10.395 |
| System Justif.     | 5.812  | 1.304 | 2.966 | 3.367 | 5.801  | 8.301  | 8.639  |
| Binding Moral      | 4.455  | 1.326 | 1.656 | 2.009 | 4.432  | 6.964  | 7.338  |
| Sci. Consensus     | 4.444  | 1.352 | 1.527 | 1.851 | 4.449  | 6.964  | 7.388  |
| Plural Ignorance   | 2.309  | 1.32  | -0.51 | -0.1  | 2.276  | 4.82   | 5.259  |

**Table S4.** Bayesian estimates of number of trees planted in each intervention, compared to the control condition.

| Intervention       | mean   | sd    | 1.5%   | 3%     | median | 97%    | 98.5%  |
|--------------------|--------|-------|--------|--------|--------|--------|--------|
| Binding Moral      | 0.038  | 0.082 | -0.14  | -0.117 | 0.039  | 0.192  | 0.213  |
| Sci. Consensus     | 0.003  | 0.081 | -0.17  | -0.146 | 0.004  | 0.158  | 0.184  |
| Dyn. Soc. Norm     | -0.009 | 0.081 | -0.182 | -0.161 | -0.008 | 0.144  | 0.171  |
| System Justif.     | -0.12  | 0.081 | -0.295 | -0.272 | -0.12  | 0.031  | 0.057  |
| Plural Ignorance   | -0.165 | 0.081 | -0.339 | -0.321 | -0.165 | -0.014 | 0.008  |
| Collective Action  | -0.185 | 0.083 | -0.361 | -0.337 | -0.187 | -0.028 | -0.005 |
| Fut. Self Cont.    | -0.229 | 0.086 | -0.413 | -0.391 | -0.229 | -0.061 | -0.038 |
| Letter Fut. Gen.   | -0.365 | 0.087 | -0.552 | -0.526 | -0.365 | -0.199 | -0.174 |
| Work Together Norm | -0.438 | 0.08  | -0.615 | -0.593 | -0.44  | -0.283 | -0.263 |
| Psych Distance     | -0.51  | 0.083 | -0.689 | -0.664 | -0.509 | -0.349 | -0.326 |
| Neg. Emotions      | -0.536 | 0.082 | -0.725 | -0.695 | -0.535 | -0.377 | -0.357 |

**Table S5. Belief by country.**

| Country         | mean   | sd    | 1.5%   | 3%     | median | 97%    | 98.5%  |
|-----------------|--------|-------|--------|--------|--------|--------|--------|
| Philippines     | 96.747 | 0.46  | 95.708 | 95.843 | 96.773 | 97.553 | 97.635 |
| Portugal        | 94.055 | 0.451 | 93.031 | 93.157 | 94.072 | 94.89  | 94.99  |
| Uganda          | 93.387 | 0.481 | 92.302 | 92.447 | 93.39  | 94.278 | 94.404 |
| Ghana           | 92.957 | 0.489 | 91.872 | 92.014 | 92.963 | 93.867 | 93.989 |
| Tanzania        | 92.854 | 1.084 | 90.229 | 90.67  | 92.915 | 94.733 | 94.991 |
| Brazil          | 92.607 | 0.355 | 91.792 | 91.912 | 92.617 | 93.239 | 93.328 |
| Turkey          | 92.478 | 0.447 | 91.522 | 91.629 | 92.477 | 93.293 | 93.402 |
| Gambia          | 92.463 | 0.3   | 91.828 | 91.905 | 92.466 | 93.007 | 93.081 |
| Chile           | 92.452 | 0.524 | 91.247 | 91.434 | 92.479 | 93.395 | 93.53  |
| Serbia          | 92.398 | 0.642 | 90.878 | 91.134 | 92.411 | 93.626 | 93.816 |
| Venezuela       | 91.975 | 1.179 | 89.143 | 89.564 | 92.049 | 94.006 | 94.291 |
| Uruguay         | 91.697 | 0.578 | 90.342 | 90.559 | 91.723 | 92.707 | 92.883 |
| Vietnam         | 91.631 | 0.676 | 90.067 | 90.339 | 91.654 | 92.847 | 93.026 |
| Mexico          | 91.399 | 0.578 | 90.128 | 90.277 | 91.388 | 92.485 | 92.636 |
| Italy           | 91.213 | 0.369 | 90.347 | 90.48  | 91.228 | 91.897 | 92.003 |
| Kenya           | 91.167 | 0.698 | 89.535 | 89.759 | 91.208 | 92.367 | 92.525 |
| North Macedonia | 90.815 | 0.498 | 89.665 | 89.846 | 90.835 | 91.675 | 91.79  |
| Peru            | 90.601 | 0.73  | 88.921 | 89.194 | 90.617 | 91.9   | 92.056 |
| Ecuador         | 90.524 | 0.553 | 89.267 | 89.446 | 90.545 | 91.505 | 91.675 |
| Nigeria         | 90.129 | 0.411 | 89.234 | 89.343 | 90.135 | 90.893 | 91.006 |
| Czechia         | 89.293 | 0.7   | 87.628 | 87.889 | 89.314 | 90.554 | 90.792 |
| Armenia         | 89.19  | 0.716 | 87.653 | 87.861 | 89.188 | 90.56  | 90.749 |
| Canada          | 89.135 | 0.52  | 87.976 | 88.102 | 89.159 | 90.058 | 90.214 |
| South Africa    | 89.102 | 0.767 | 87.409 | 87.612 | 89.127 | 90.537 | 90.681 |
| India           | 88.96  | 0.664 | 87.432 | 87.654 | 88.98  | 90.168 | 90.389 |
| Sri Lanka       | 88.652 | 0.865 | 86.66  | 86.929 | 88.682 | 90.198 | 90.408 |
| Ukraine         | 88.368 | 0.759 | 86.643 | 86.881 | 88.406 | 89.702 | 89.894 |
| Spain           | 88.212 | 0.781 | 86.348 | 86.653 | 88.233 | 89.699 | 89.897 |
| Romania         | 88.046 | 0.883 | 86.064 | 86.301 | 88.058 | 89.647 | 89.865 |
| Ireland         | 87.15  | 0.666 | 85.624 | 85.842 | 87.154 | 88.367 | 88.588 |
| South Korea     | 85.666 | 0.812 | 83.785 | 84.024 | 85.699 | 87.144 | 87.398 |
| France          | 85.492 | 0.592 | 84.076 | 84.292 | 85.506 | 86.551 | 86.707 |
| Algeria         | 85.084 | 0.919 | 83.045 | 83.311 | 85.09  | 86.747 | 86.995 |
| Morocco         | 84.872 | 0.971 | 82.576 | 82.881 | 84.926 | 86.581 | 86.805 |
| China           | 84.692 | 0.709 | 83.101 | 83.32  | 84.711 | 85.955 | 86.16  |
| Bulgaria        | 84.629 | 0.771 | 82.955 | 83.208 | 84.628 | 86.073 | 86.284 |
| Switzerland     | 84.515 | 0.684 | 82.977 | 83.163 | 84.53  | 85.741 | 85.911 |
| Thailand        | 83.984 | 0.967 | 81.835 | 82.115 | 84.022 | 85.761 | 85.979 |
| Singapore       | 83.941 | 0.867 | 82.046 | 82.288 | 83.938 | 85.568 | 85.934 |
| Poland          | 83.593 | 0.518 | 82.443 | 82.566 | 83.615 | 84.527 | 84.672 |

|              |        |       |        |        |        |        |        |
|--------------|--------|-------|--------|--------|--------|--------|--------|
| Germany      | 83.33  | 0.632 | 81.981 | 82.169 | 83.321 | 84.533 | 84.705 |
| UK           | 82.663 | 0.608 | 81.265 | 81.516 | 82.674 | 83.764 | 83.941 |
| Austria      | 82.254 | 1.04  | 79.734 | 80.151 | 82.305 | 84.075 | 84.398 |
| UAE          | 81.942 | 1.016 | 79.602 | 79.966 | 81.958 | 83.751 | 84.045 |
| Greece       | 81.318 | 1.051 | 78.973 | 79.264 | 81.332 | 83.301 | 83.531 |
| Australia    | 81.316 | 0.82  | 79.469 | 79.7   | 81.345 | 82.823 | 83.037 |
| Russia       | 81.226 | 0.708 | 79.681 | 79.887 | 81.235 | 82.584 | 82.728 |
| Slovenia     | 80.135 | 1.18  | 77.379 | 77.743 | 80.189 | 82.23  | 82.445 |
| Netherlands  | 80.092 | 0.677 | 78.589 | 78.784 | 80.099 | 81.354 | 81.533 |
| Denmark      | 79.843 | 0.972 | 77.656 | 77.993 | 79.844 | 81.63  | 81.926 |
| Finland      | 79.436 | 1.127 | 77.014 | 77.333 | 79.425 | 81.454 | 81.737 |
| Slovakia     | 79.396 | 0.89  | 77.342 | 77.609 | 79.438 | 80.904 | 81.136 |
| Belgium      | 79.384 | 0.875 | 77.393 | 77.659 | 79.424 | 80.966 | 81.165 |
| Sweden       | 79.343 | 0.648 | 77.842 | 78.062 | 79.333 | 80.527 | 80.699 |
| Taiwan       | 79.281 | 1.756 | 75.177 | 75.899 | 79.342 | 82.588 | 83.03  |
| Sudan        | 79.217 | 1.058 | 76.913 | 77.229 | 79.241 | 81.058 | 81.214 |
| New Zealand  | 79.152 | 0.859 | 77.212 | 77.488 | 79.169 | 80.748 | 80.977 |
| Japan        | 79.148 | 0.733 | 77.501 | 77.759 | 79.147 | 80.443 | 80.629 |
| Latvia       | 76.918 | 1.378 | 73.982 | 74.384 | 76.929 | 79.475 | 79.801 |
| USA          | 76.861 | 0.467 | 75.819 | 75.945 | 76.882 | 77.687 | 77.8   |
| Norway       | 76.248 | 0.898 | 74.234 | 74.541 | 76.256 | 77.931 | 78.188 |
| Saudi Arabia | 73.952 | 1.469 | 70.969 | 71.339 | 73.941 | 76.716 | 77.138 |
| Israel       | 73.439 | 0.891 | 71.426 | 71.688 | 73.468 | 75.037 | 75.294 |

**Table S6. Policy support by country.**

| Country         | mean   | sd    | 1.5%   | 3%     | median | 97%    | 98.5%  |
|-----------------|--------|-------|--------|--------|--------|--------|--------|
| Turkey          | 80.201 | 0.635 | 78.839 | 79.014 | 80.185 | 81.407 | 81.573 |
| Brazil          | 78.445 | 0.565 | 77.204 | 77.35  | 78.442 | 79.503 | 79.643 |
| Chile           | 78.425 | 0.469 | 77.42  | 77.547 | 78.429 | 79.31  | 79.438 |
| Uganda          | 78.278 | 0.893 | 76.328 | 76.582 | 78.272 | 79.967 | 80.232 |
| India           | 77.921 | 0.647 | 76.479 | 76.687 | 77.926 | 79.164 | 79.342 |
| Sri Lanka       | 77.858 | 0.767 | 76.13  | 76.388 | 77.849 | 79.3   | 79.52  |
| Ghana           | 77.564 | 0.744 | 75.985 | 76.178 | 77.554 | 78.958 | 79.201 |
| Taiwan          | 77.336 | 1.48  | 74.05  | 74.497 | 77.335 | 80.053 | 80.405 |
| Ukraine         | 76.983 | 0.724 | 75.392 | 75.62  | 76.997 | 78.318 | 78.554 |
| Uruguay         | 76.859 | 0.763 | 75.198 | 75.402 | 76.867 | 78.313 | 78.496 |
| Nigeria         | 76.617 | 0.512 | 75.497 | 75.653 | 76.619 | 77.569 | 77.714 |
| Venezuela       | 76.565 | 1.584 | 73.061 | 73.495 | 76.589 | 79.495 | 79.863 |
| Mexico          | 76.361 | 0.827 | 74.582 | 74.852 | 76.365 | 77.92  | 78.152 |
| Philippines     | 76.353 | 1.293 | 73.538 | 73.903 | 76.38  | 78.786 | 79.061 |
| Vietnam         | 76.083 | 0.932 | 73.989 | 74.3   | 76.096 | 77.784 | 78.084 |
| Gambia          | 75.981 | 0.793 | 74.187 | 74.467 | 75.989 | 77.488 | 77.73  |
| China           | 75.82  | 0.649 | 74.416 | 74.624 | 75.808 | 77.069 | 77.271 |
| Serbia          | 75.646 | 0.934 | 73.624 | 73.868 | 75.656 | 77.348 | 77.657 |
| Portugal        | 75.578 | 0.809 | 73.839 | 74.051 | 75.566 | 77.121 | 77.359 |
| Algeria         | 75.326 | 0.759 | 73.669 | 73.888 | 75.319 | 76.722 | 76.976 |
| Spain           | 75.11  | 0.838 | 73.305 | 73.558 | 75.125 | 76.663 | 76.945 |
| Sudan           | 75.01  | 0.809 | 73.256 | 73.441 | 75.021 | 76.491 | 76.666 |
| Morocco         | 74.933 | 0.892 | 73.007 | 73.267 | 74.925 | 76.637 | 76.907 |
| Ecuador         | 74.365 | 0.76  | 72.765 | 72.986 | 74.358 | 75.799 | 75.993 |
| Bulgaria        | 73.86  | 0.764 | 72.147 | 72.436 | 73.864 | 75.284 | 75.522 |
| Thailand        | 73.766 | 0.932 | 71.752 | 71.954 | 73.781 | 75.476 | 75.78  |
| Italy           | 73.757 | 0.543 | 72.576 | 72.763 | 73.755 | 74.782 | 74.927 |
| South Africa    | 73.328 | 0.895 | 71.409 | 71.653 | 73.328 | 75.024 | 75.341 |
| Ireland         | 73.256 | 0.735 | 71.7   | 71.859 | 73.255 | 74.615 | 74.779 |
| Kenya           | 73.196 | 0.885 | 71.283 | 71.53  | 73.205 | 74.859 | 75.06  |
| UK              | 72.706 | 0.61  | 71.391 | 71.559 | 72.71  | 73.877 | 74.085 |
| South Korea     | 72.512 | 0.829 | 70.713 | 70.914 | 72.52  | 74.064 | 74.302 |
| Canada          | 72.018 | 0.661 | 70.594 | 70.774 | 72.007 | 73.262 | 73.445 |
| Singapore       | 71.941 | 0.887 | 70.005 | 70.292 | 71.936 | 73.608 | 73.864 |
| North Macedonia | 71.941 | 0.652 | 70.468 | 70.75  | 71.963 | 73.132 | 73.365 |
| Peru            | 71.87  | 0.93  | 69.824 | 70.114 | 71.865 | 73.592 | 73.83  |
| Australia       | 71.744 | 0.748 | 70.123 | 70.312 | 71.731 | 73.187 | 73.399 |
| Romania         | 71.679 | 0.983 | 69.539 | 69.809 | 71.701 | 73.531 | 73.792 |
| Tanzania        | 71.283 | 1.955 | 66.959 | 67.596 | 71.282 | 74.866 | 75.397 |
| France          | 70.641 | 0.612 | 69.278 | 69.475 | 70.646 | 71.785 | 71.944 |

|              |        |       |        |        |        |        |        |
|--------------|--------|-------|--------|--------|--------|--------|--------|
| Netherlands  | 70.631 | 0.586 | 69.356 | 69.554 | 70.639 | 71.729 | 71.892 |
| UAE          | 70.519 | 0.928 | 68.478 | 68.759 | 70.536 | 72.248 | 72.512 |
| Greece       | 70.466 | 0.803 | 68.725 | 68.978 | 70.471 | 71.986 | 72.194 |
| Denmark      | 70.356 | 0.84  | 68.5   | 68.761 | 70.359 | 71.915 | 72.177 |
| Poland       | 70.223 | 0.509 | 69.155 | 69.301 | 70.212 | 71.199 | 71.354 |
| Armenia      | 69.95  | 0.812 | 68.195 | 68.479 | 69.932 | 71.495 | 71.768 |
| Switzerland  | 69.881 | 0.725 | 68.28  | 68.481 | 69.878 | 71.207 | 71.431 |
| Slovenia     | 69.713 | 0.896 | 67.822 | 68.03  | 69.709 | 71.384 | 71.599 |
| Czechia      | 68.975 | 0.906 | 66.989 | 67.269 | 68.965 | 70.681 | 70.886 |
| Israel       | 68.435 | 0.591 | 67.119 | 67.298 | 68.437 | 69.543 | 69.756 |
| Austria      | 68.046 | 0.949 | 66.023 | 66.281 | 68.058 | 69.777 | 70.017 |
| USA          | 67.88  | 0.431 | 66.916 | 67.036 | 67.887 | 68.671 | 68.771 |
| Germany      | 67.674 | 0.643 | 66.299 | 66.474 | 67.67  | 68.908 | 69.099 |
| Belgium      | 67.118 | 0.746 | 65.512 | 65.722 | 67.098 | 68.528 | 68.735 |
| New Zealand  | 67.028 | 0.767 | 65.367 | 65.599 | 67.027 | 68.481 | 68.697 |
| Norway       | 67.013 | 0.758 | 65.327 | 65.539 | 67.009 | 68.436 | 68.66  |
| Sweden       | 66.273 | 0.58  | 64.976 | 65.172 | 66.268 | 67.352 | 67.507 |
| Russia       | 64.992 | 0.579 | 63.756 | 63.92  | 64.986 | 66.103 | 66.259 |
| Finland      | 64.545 | 0.994 | 62.353 | 62.61  | 64.544 | 66.362 | 66.646 |
| Saudi Arabia | 64.444 | 1.093 | 62.171 | 62.508 | 64.416 | 66.544 | 66.834 |
| Slovakia     | 64.362 | 0.703 | 62.865 | 63.038 | 64.358 | 65.689 | 65.858 |
| Latvia       | 62.491 | 0.983 | 60.326 | 60.591 | 62.512 | 64.358 | 64.592 |
| Japan        | 58.939 | 0.616 | 57.613 | 57.798 | 58.945 | 60.097 | 60.275 |

**Table S7. Sharing intentions by country.**

| Country      | mean   | sd    | 1.5%   | 3%     | median | 97%    | 98.5%  |
|--------------|--------|-------|--------|--------|--------|--------|--------|
| Kenya        | 93.31  | 1.437 | 89.913 | 90.418 | 93.426 | 95.709 | 95.969 |
| Uganda       | 91.743 | 1.88  | 87.214 | 87.855 | 91.873 | 94.834 | 95.339 |
| Mexico       | 90.518 | 1.53  | 86.866 | 87.42  | 90.596 | 93.149 | 93.489 |
| Taiwan       | 88.544 | 2.757 | 81.7   | 83.04  | 88.705 | 93.337 | 94.025 |
| Ecuador      | 88.295 | 1.408 | 85.068 | 85.514 | 88.361 | 90.728 | 91.051 |
| Gambia       | 87.53  | 1.656 | 83.911 | 84.365 | 87.581 | 90.524 | 91.035 |
| Nigeria      | 86.151 | 0.977 | 83.916 | 84.251 | 86.166 | 87.89  | 88.244 |
| Ghana        | 85.086 | 1.758 | 81.183 | 81.675 | 85.133 | 88.257 | 88.665 |
| Tanzania     | 82.466 | 4.43  | 72.229 | 73.671 | 82.664 | 90.198 | 90.939 |
| UAE          | 81.872 | 1.717 | 78.087 | 78.663 | 81.876 | 84.983 | 85.388 |
| Vietnam      | 81.416 | 2.309 | 76.107 | 76.954 | 81.581 | 85.437 | 86.051 |
| Thailand     | 81.093 | 2.097 | 76.417 | 77.093 | 81.121 | 84.968 | 85.517 |
| China        | 80.925 | 1.44  | 77.75  | 78.191 | 80.932 | 83.51  | 83.837 |
| Peru         | 80.692 | 2.314 | 75.356 | 76.058 | 80.749 | 84.931 | 85.465 |
| Saudi Arabia | 80.387 | 1.778 | 76.361 | 76.968 | 80.417 | 83.59  | 84.102 |
| South Korea  | 79.702 | 2.197 | 74.722 | 75.38  | 79.756 | 83.727 | 84.351 |
| India        | 78.964 | 1.608 | 75.443 | 75.878 | 78.991 | 81.939 | 82.332 |
| South Africa | 77.534 | 2.145 | 72.813 | 73.381 | 77.549 | 81.466 | 82.084 |
| Morocco      | 76.654 | 2.116 | 71.898 | 72.58  | 76.713 | 80.525 | 81.113 |
| Chile        | 74.184 | 1.191 | 71.658 | 71.97  | 74.167 | 76.464 | 76.76  |
| Brazil       | 73.233 | 1.409 | 70.123 | 70.521 | 73.256 | 75.824 | 76.273 |
| Algeria      | 71.205 | 2.15  | 66.353 | 67.162 | 71.19  | 75.038 | 75.525 |
| Singapore    | 68.836 | 2.176 | 64.203 | 64.819 | 68.883 | 72.738 | 73.444 |
| Uruguay      | 68.78  | 2.526 | 63.148 | 63.917 | 68.883 | 73.361 | 74.062 |
| Greece       | 66.537 | 2.305 | 61.533 | 62.161 | 66.559 | 70.846 | 71.454 |
| Sudan        | 66.491 | 1.941 | 62.435 | 62.844 | 66.5   | 70.158 | 70.738 |
| Venezuela    | 66.344 | 4.934 | 55.454 | 56.782 | 66.413 | 75.446 | 77.046 |
| Philippines  | 65.902 | 4.414 | 56.219 | 57.384 | 65.891 | 73.895 | 75.357 |
| France       | 64.752 | 1.5   | 61.54  | 61.94  | 64.755 | 67.583 | 67.945 |
| Sri Lanka    | 64.328 | 2.918 | 57.922 | 58.69  | 64.353 | 69.722 | 70.551 |
| Bulgaria     | 64.26  | 2.122 | 59.538 | 60.124 | 64.339 | 68.201 | 68.753 |
| Ireland      | 62.759 | 2.204 | 57.926 | 58.503 | 62.775 | 66.783 | 67.301 |
| USA          | 61.391 | 0.682 | 59.916 | 60.119 | 61.385 | 62.695 | 62.902 |
| Italy        | 57.09  | 1.491 | 53.891 | 54.306 | 57.102 | 59.856 | 60.285 |
| UK           | 55.063 | 1.393 | 52.023 | 52.497 | 55.092 | 57.584 | 57.986 |
| Spain        | 54.985 | 3.029 | 48.591 | 49.382 | 54.984 | 60.563 | 61.501 |
| Slovenia     | 53.929 | 2.686 | 48.062 | 48.817 | 53.924 | 59.043 | 59.99  |
| Sweden       | 53.058 | 1.234 | 50.478 | 50.752 | 53.076 | 55.32  | 55.776 |
| Denmark      | 51.981 | 2.146 | 47.428 | 47.898 | 51.99  | 56.016 | 56.542 |
| Turkey       | 48.186 | 2.195 | 43.447 | 44.117 | 48.156 | 52.302 | 52.844 |



|                 |        |       |        |        |        |        |        |
|-----------------|--------|-------|--------|--------|--------|--------|--------|
| Australia       | 45.53  | 2.075 | 40.871 | 41.597 | 45.541 | 49.522 | 50.215 |
| New Zealand     | 37.913 | 1.782 | 33.92  | 34.598 | 37.917 | 41.228 | 41.754 |
| Portugal        | 36.846 | 2.624 | 31.254 | 32.018 | 36.884 | 41.748 | 42.542 |
| Finland         | 35.997 | 2.217 | 31.283 | 31.857 | 35.971 | 40.224 | 40.93  |
| Canada          | 35.824 | 1.684 | 32.27  | 32.678 | 35.782 | 38.918 | 39.367 |
| Poland          | 35.555 | 1.239 | 32.906 | 33.248 | 35.562 | 37.891 | 38.317 |
| Belgium         | 35.172 | 1.781 | 31.455 | 31.861 | 35.137 | 38.561 | 39.07  |
| Ukraine         | 34.285 | 2.412 | 29.372 | 29.887 | 34.258 | 38.955 | 39.714 |
| Armenia         | 32.677 | 2.393 | 27.546 | 28.264 | 32.635 | 37.313 | 37.996 |
| Germany         | 31.981 | 1.466 | 28.809 | 29.274 | 31.954 | 34.732 | 35.24  |
| Israel          | 31.629 | 1.68  | 28.09  | 28.442 | 31.617 | 34.834 | 35.395 |
| Slovakia        | 30.655 | 1.647 | 27.065 | 27.637 | 30.641 | 33.806 | 34.307 |
| North Macedonia | 28.421 | 1.871 | 24.443 | 24.903 | 28.461 | 31.937 | 32.364 |
| Austria         | 27.791 | 2.325 | 22.971 | 23.578 | 27.753 | 32.242 | 32.957 |
| Switzerland     | 26.868 | 1.743 | 23.171 | 23.71  | 26.854 | 30.263 | 30.85  |
| Serbia          | 26.537 | 2.713 | 21.029 | 21.639 | 26.433 | 31.747 | 32.44  |
| Russia          | 26.052 | 1.41  | 23.027 | 23.445 | 26.03  | 28.729 | 29.216 |
| Japan           | 24.205 | 1.415 | 21.274 | 21.618 | 24.199 | 26.888 | 27.234 |
| Czechia         | 20.411 | 1.909 | 16.319 | 16.887 | 20.369 | 24.17  | 24.672 |
| Romania         | 19.597 | 2.24  | 15.141 | 15.559 | 19.52  | 24.07  | 24.782 |
| Netherlands     | 19.335 | 1.113 | 17.006 | 17.313 | 19.325 | 21.478 | 21.761 |
| Norway          | 19.178 | 1.467 | 16.118 | 16.46  | 19.168 | 22.081 | 22.577 |
| Latvia          | 17.684 | 1.9   | 13.816 | 14.27  | 17.629 | 21.378 | 22.103 |

**Table S8. Number of trees planted by country.**

| Country      | mean  | sd    | 1.5%  | 3%    | median | 97%   | 98.5% |
|--------------|-------|-------|-------|-------|--------|-------|-------|
| Kenya        | 6.958 | 0.42  | 6.048 | 6.167 | 6.978  | 7.678 | 7.745 |
| Serbia       | 6.851 | 0.346 | 6.188 | 6.268 | 6.824  | 7.55  | 7.636 |
| Venezuela    | 6.815 | 0.485 | 5.819 | 5.939 | 6.796  | 7.734 | 7.811 |
| Philippines  | 6.447 | 0.459 | 5.606 | 5.712 | 6.393  | 7.52  | 7.676 |
| Chile        | 6.418 | 0.09  | 6.222 | 6.245 | 6.418  | 6.583 | 6.613 |
| Slovakia     | 6.348 | 0.108 | 6.098 | 6.14  | 6.349  | 6.549 | 6.585 |
| Italy        | 6.33  | 0.129 | 6.062 | 6.101 | 6.327  | 6.582 | 6.616 |
| China        | 6.204 | 0.161 | 5.878 | 5.917 | 6.198  | 6.525 | 6.587 |
| UAE          | 6.126 | 0.145 | 5.817 | 5.853 | 6.126  | 6.4   | 6.435 |
| South Korea  | 6.126 | 0.177 | 5.761 | 5.808 | 6.122  | 6.481 | 6.55  |
| Thailand     | 6.085 | 0.16  | 5.744 | 5.789 | 6.088  | 6.385 | 6.438 |
| Poland       | 6.057 | 0.098 | 5.853 | 5.878 | 6.057  | 6.239 | 6.27  |
| Saudi Arabia | 5.959 | 0.173 | 5.584 | 5.635 | 5.96   | 6.288 | 6.344 |
| Norway       | 5.894 | 0.121 | 5.629 | 5.662 | 5.895  | 6.125 | 6.15  |
| Spain        | 5.855 | 0.173 | 5.486 | 5.529 | 5.855  | 6.184 | 6.24  |
| Australia    | 5.807 | 0.12  | 5.53  | 5.576 | 5.81   | 6.023 | 6.054 |
| Nigeria      | 5.776 | 0.106 | 5.545 | 5.575 | 5.776  | 5.972 | 6.002 |
| Czechia      | 5.75  | 0.209 | 5.329 | 5.372 | 5.745  | 6.167 | 6.23  |
| Romania      | 5.674 | 0.194 | 5.263 | 5.322 | 5.67   | 6.046 | 6.1   |
| Mexico       | 5.659 | 0.17  | 5.296 | 5.343 | 5.657  | 5.981 | 6.03  |
| Turkey       | 5.607 | 0.161 | 5.266 | 5.312 | 5.602  | 5.918 | 5.965 |
| Brazil       | 5.591 | 0.114 | 5.339 | 5.375 | 5.591  | 5.798 | 5.832 |
| Uganda       | 5.576 | 0.239 | 5.116 | 5.164 | 5.565  | 6.052 | 6.154 |
| Latvia       | 5.47  | 0.308 | 4.884 | 4.948 | 5.45   | 6.08  | 6.183 |
| France       | 5.449 | 0.104 | 5.221 | 5.25  | 5.451  | 5.639 | 5.668 |
| Portugal     | 5.446 | 0.28  | 4.913 | 4.979 | 5.427  | 6.023 | 6.137 |
| Ukraine      | 5.369 | 0.247 | 4.878 | 4.938 | 5.356  | 5.874 | 5.977 |
| Uruguay      | 5.369 | 0.172 | 5.005 | 5.047 | 5.368  | 5.691 | 5.743 |
| Greece       | 5.368 | 0.152 | 5.041 | 5.084 | 5.367  | 5.649 | 5.696 |
| Bulgaria     | 5.365 | 0.141 | 5.065 | 5.102 | 5.362  | 5.634 | 5.68  |
| Switzerland  | 5.359 | 0.132 | 5.067 | 5.112 | 5.356  | 5.615 | 5.658 |
| Ghana        | 5.348 | 0.171 | 4.976 | 5.022 | 5.35   | 5.679 | 5.735 |
| New Zealand  | 5.34  | 0.129 | 5.062 | 5.096 | 5.341  | 5.58  | 5.613 |
| Belgium      | 5.317 | 0.123 | 5.05  | 5.083 | 5.316  | 5.555 | 5.586 |
| Japan        | 5.296 | 0.108 | 5.059 | 5.094 | 5.295  | 5.5   | 5.523 |
| Denmark      | 5.189 | 0.134 | 4.897 | 4.938 | 5.19   | 5.442 | 5.483 |
| Vietnam      | 5.137 | 0.222 | 4.669 | 4.729 | 5.131  | 5.561 | 5.619 |
| Canada       | 5.121 | 0.132 | 4.832 | 4.87  | 5.118  | 5.372 | 5.414 |
| Israel       | 5.102 | 0.127 | 4.831 | 4.867 | 5.103  | 5.337 | 5.376 |
| USA          | 5.097 | 0.065 | 4.953 | 4.978 | 5.096  | 5.22  | 5.239 |

|                 |       |       |       |       |       |       |       |
|-----------------|-------|-------|-------|-------|-------|-------|-------|
| South Africa    | 5.096 | 0.169 | 4.726 | 4.77  | 5.101 | 5.411 | 5.449 |
| Peru            | 5.083 | 0.212 | 4.623 | 4.691 | 5.082 | 5.493 | 5.557 |
| UK              | 5.034 | 0.103 | 4.813 | 4.839 | 5.035 | 5.225 | 5.253 |
| Sri Lanka       | 4.928 | 0.19  | 4.519 | 4.566 | 4.931 | 5.282 | 5.334 |
| Germany         | 4.919 | 0.104 | 4.694 | 4.725 | 4.918 | 5.115 | 5.139 |
| Russia          | 4.893 | 0.119 | 4.635 | 4.669 | 4.892 | 5.119 | 5.16  |
| Ecuador         | 4.887 | 0.163 | 4.541 | 4.585 | 4.885 | 5.197 | 5.24  |
| Algeria         | 4.772 | 0.167 | 4.417 | 4.456 | 4.773 | 5.086 | 5.134 |
| Tanzania        | 4.68  | 0.387 | 3.862 | 3.969 | 4.675 | 5.421 | 5.561 |
| Netherlands     | 4.567 | 0.107 | 4.332 | 4.363 | 4.565 | 4.776 | 4.806 |
| Morocco         | 4.557 | 0.178 | 4.177 | 4.224 | 4.558 | 4.896 | 4.951 |
| Sweden          | 4.441 | 0.093 | 4.233 | 4.265 | 4.442 | 4.609 | 4.641 |
| North Macedonia | 4.262 | 0.146 | 3.961 | 3.991 | 4.259 | 4.539 | 4.584 |
| Singapore       | 4.25  | 0.172 | 3.875 | 3.929 | 4.25  | 4.567 | 4.616 |
| Austria         | 4.204 | 0.172 | 3.828 | 3.88  | 4.201 | 4.536 | 4.575 |
| Gambia          | 4.179 | 0.173 | 3.806 | 3.852 | 4.181 | 4.503 | 4.562 |
| Sudan           | 4.128 | 0.152 | 3.804 | 3.843 | 4.126 | 4.418 | 4.462 |
| Slovenia        | 3.918 | 0.175 | 3.536 | 3.593 | 3.915 | 4.251 | 4.299 |
| Finland         | 3.843 | 0.156 | 3.507 | 3.545 | 3.844 | 4.133 | 4.177 |
| Armenia         | 3.792 | 0.176 | 3.419 | 3.466 | 3.79  | 4.13  | 4.174 |
| Ireland         | 3.246 | 0.145 | 2.932 | 2.979 | 3.24  | 3.526 | 3.561 |
| India           | 2.921 | 0.143 | 2.631 | 2.667 | 2.918 | 3.199 | 3.233 |
| Taiwan          | 1.469 | 0.184 | 1.107 | 1.153 | 1.459 | 1.836 | 1.908 |

**Table S9:** Coefficient table from pre-registered analysis of climate beliefs. Results are from a linear mixed effects model with climate beliefs as the dependent variable, condition as the fixed effect, including item (4 beliefs), participant, and country as random effects. Estimates are shown relative to the Control Condition.

| Intervention     | Estimate | SE   | <i>df</i> | <i>t</i> | <i>d</i> | <i>p</i>     |
|------------------|----------|------|-----------|----------|----------|--------------|
| (Intercept)      | 79.98    | 0.88 | 79.30     | 91.20    | 20.48    | < .001       |
| PsychDistance    | 3.22     | 0.47 | 59166.56  | 6.86     | 0.06     | < .001       |
| CollectAction    | 2.25     | 0.46 | 59166.10  | 4.90     | 0.04     | < .001       |
| LetterFutureGen  | 1.88     | 0.49 | 59170.10  | 3.84     | 0.03     | < .001       |
| SystemJust       | 1.71     | 0.46 | 59170.14  | 3.74     | 0.03     | < .001       |
| FutureSelfCont   | 1.80     | 0.48 | 59176.06  | 3.72     | 0.03     | < .001       |
| SciConsens       | 1.25     | 0.46 | 59168.87  | 2.75     | 0.02     | <b>0.006</b> |
| BindingMoral     | 1.09     | 0.46 | 59172.21  | 2.37     | 0.02     | <b>0.018</b> |
| PluralIgnorance  | 0.93     | 0.46 | 59161.92  | 2.03     | 0.02     | <b>0.042</b> |
| DynamicNorm      | 0.76     | 0.46 | 59185.00  | 1.66     | 0.01     | 0.098        |
| NegativeEmotions | 0.75     | 0.46 | 59166.90  | 1.63     | 0.01     | 0.103        |
| WorkTogetherNorm | -0.62    | 0.46 | 59160.72  | -1.36    | -0.01    | 0.174        |

**Table S10:** Coefficient table from pre-registered analysis of climate policy support. Results are from a linear mixed effects model with climate policy support, as the dependent variable, condition as the fixed effect, including item (9 policies), participant, and country as random effects. Estimates are shown relative to the Control Condition.

| Intervention     | Estimate | SE   | <i>df</i> | <i>t</i> | <i>d</i> | <i>p</i>     |
|------------------|----------|------|-----------|----------|----------|--------------|
| (Intercept)      | 70.23    | 4.02 | 8.42      | 17.45    | 12.03    | < .001       |
| CollectAction    | 2.89     | 0.38 | 58566.33  | 7.71     | 0.06     | < .001       |
| LetterFutureGen  | 2.81     | 0.40 | 58603.94  | 7.01     | 0.06     | < .001       |
| FutureSelfCont   | 2.06     | 0.40 | 58598.68  | 5.21     | 0.04     | < .001       |
| PsychDistance    | 1.34     | 0.38 | 58643.56  | 3.49     | 0.03     | < .001       |
| DynamicNorm      | 1.14     | 0.38 | 58602.04  | 3.04     | 0.03     | <b>0.002</b> |
| SystemJust       | 0.91     | 0.37 | 58568.86  | 2.44     | 0.02     | <b>0.015</b> |
| SciConsens       | 0.80     | 0.37 | 58609.08  | 2.14     | 0.02     | <b>0.032</b> |
| BindingMoral     | 0.72     | 0.38 | 58582.48  | 1.91     | 0.02     | 0.057        |
| PluralIgnorance  | 0.33     | 0.37 | 58578.83  | 0.89     | 0.01     | 0.373        |
| WorkTogetherNorm | -0.10    | 0.38 | 58621.02  | -0.26    | 0.00     | 0.794        |
| NegativeEmotions | -0.25    | 0.38 | 58576.15  | -0.68    | -0.01    | 0.499        |

**Table S11:** Coefficient table from pre-registered analysis of Social Media Sharing. Results are from logistic mixed effects model with social media sharing as the dependent variable, condition as the fixed effect, including country as random effects. Estimates are shown relative to Control.

| Intervention     | Estimate | SE   | <i>z</i> | <i>d</i> | <i>p</i> |
|------------------|----------|------|----------|----------|----------|
| (Intercept)      | 0.08     | 0.15 | 0.51     | 0.04     | 0.611    |
| NegativeEmotions | 0.49     | 0.05 | 9.43     | 0.27     | < .001   |
| CollectAction    | 0.40     | 0.05 | 7.76     | 0.22     | < .001   |
| LetterFutureGen  | 0.40     | 0.06 | 7.24     | 0.22     | < .001   |
| PsychDistance    | 0.35     | 0.05 | 6.64     | 0.19     | < .001   |
| DynamicNorm      | 0.31     | 0.05 | 6.12     | 0.17     | < .001   |
| FutureSelfCont   | 0.31     | 0.05 | 5.82     | 0.17     | < .001   |
| WorkTogetherNorm | 0.23     | 0.05 | 4.65     | 0.13     | < .001   |
| SystemJust       | 0.23     | 0.05 | 4.60     | 0.13     | < .001   |
| BindingMoral     | 0.19     | 0.05 | 3.81     | 0.11     | < .001   |
| SciConsens       | 0.18     | 0.05 | 3.65     | 0.10     | < .001   |
| PluralIgnorance  | 0.10     | 0.05 | 1.90     | 0.05     | 0.057    |

**Table S12:** Coefficient table from pre-registered analysis of WEPT. Results are from an ordinal mixed effects model with climate action (WEPT), as the dependent variable, condition as the fixed effect, including country as random effects. Estimates are shown relative to the Control Condition.

| Intervention     | Estimate | SE   | <i>z</i> | <i>d</i> | <i>p</i>          |
|------------------|----------|------|----------|----------|-------------------|
| BindingMoral     | 0.04     | 0.04 | 0.89     | 0.03     | 0.375             |
| SciConsens       | 0.03     | 0.04 | 0.65     | -0.01    | 0.513             |
| DynamicNorm      | 0.01     | 0.04 | 0.25     | -0.01    | 0.800             |
| SystemJust       | -0.05    | 0.04 | -1.39    | -0.05    | 0.163             |
| PluralIgnorance  | -0.07    | 0.04 | -1.82    | -0.05    | 0.068             |
| CollectAction    | -0.11    | 0.04 | -3.02    | -0.06    | <b>0.003</b>      |
| FutureSelfCont   | -0.12    | 0.04 | -3.04    | -0.06    | <b>0.002</b>      |
| LetterFutureGen  | -0.23    | 0.04 | -5.67    | -0.13    | <b>&lt; 0.001</b> |
| WorkTogetherNorm | -0.25    | 0.04 | -6.61    | -0.15    | <b>&lt; 0.001</b> |
| PsychDistance    | -0.27    | 0.04 | -7.11    | -0.15    | <b>&lt; 0.001</b> |
| NegativeEmotions | -0.29    | 0.04 | -7.67    | -0.16    | <b>&lt; 0.001</b> |

**Table S13:** Coefficient table for an ordinal mixed effects model with climate action (i.e., number of trees planted in the WEPT) as the dependent variable, belief in climate change as the fixed effect, including country random effects.

| Predictor | Estimate | SE     | <i>z</i> | <i>p</i> |
|-----------|----------|--------|----------|----------|
| Belief    | 0.01     | 0.0003 | 29.84    | < .001   |



**Table S14:** Coefficient table for an ordinal mixed effects model with climate action (i.e., number of trees planted in the WEPT) as the dependent variable, policy support as the fixed effect, including country random effects.

| Predictor | Estimate | SE     | <i>z</i> | <i>p</i> |
|-----------|----------|--------|----------|----------|
| Policy    | 0.01     | 0.0004 | 30.72    | < .001   |

**Table S15:** Coefficient table for an ordinal mixed effects model with climate action (i.e., number of trees planted in the WEPT) as the dependent variable, willingness to share climate information as the fixed effect, including country random effects.

| Predictor            | Estimate | SE   | <i>z</i> | <i>p</i> |
|----------------------|----------|------|----------|----------|
| Willingness to share | 0.33     | 0.02 | 16.29    | < .001   |

**Table S16:** Coefficient table for an ordinal mixed effects model with climate action (i.e., number of trees planted in the WEPT) as the dependent variable, belief in climate change in each condition as the fixed effect, including country random effects.

| Belief: Intervention     | Estimate | SE     | <i>z</i> | <i>p</i>       |
|--------------------------|----------|--------|----------|----------------|
| Belief: SciConsens       | 0.012    | 0.0005 | 24.96    | < <b>0.001</b> |
| Belief: BindingMoral     | 0.012    | 0.0005 | 24.77    | < <b>0.001</b> |
| Belief: DynamicNorm      | 0.011    | 0.0005 | 24.30    | < <b>0.001</b> |
| Belief: Control          | 0.011    | 0.0005 | 23.93    | < <b>0.001</b> |
| Belief: SystemJust       | 0.011    | 0.0005 | 22.72    | < <b>0.001</b> |
| Belief: PluralIgnorance  | 0.011    | 0.0005 | 22.40    | < <b>0.001</b> |
| Belief: CollectAction    | 0.010    | 0.0005 | 21.46    | < <b>0.001</b> |
| Belief: FutureSelfCont   | 0.010    | 0.0005 | 20.71    | < <b>0.001</b> |
| Belief: WorkTogetherNorm | 0.009    | 0.0005 | 19.21    | < <b>0.001</b> |
| Belief: NegativeEmotions | 0.008    | 0.0005 | 17.97    | < <b>0.001</b> |
| Belief: LetterFutureGen  | 0.009    | 0.0005 | 17.85    | < <b>0.001</b> |
| Belief: PsychDistance    | 0.008    | 0.0005 | 17.40    | < <b>0.001</b> |

**Table S17:** Coefficient table for an ordinal mixed effects model with climate action (i.e., number of trees planted in the WEPT) as the dependent variable, policy support in each condition as the fixed effect, including country random effects.

| Policy: Intervention     | Estimate | SE     | <i>z</i> | <i>p</i>       |
|--------------------------|----------|--------|----------|----------------|
| Policy: SciConsens       | 0.015    | 0.0006 | 26.760   | < <b>0.001</b> |
| Policy: BindingMoral     | 0.015    | 0.0006 | 26.580   | < <b>0.001</b> |
| Policy: DynamicNorm      | 0.015    | 0.0006 | 25.980   | < <b>0.001</b> |
| Policy: Control          | 0.015    | 0.0006 | 25.850   | < <b>0.001</b> |
| Policy: SystemJust       | 0.014    | 0.0006 | 24.650   | < <b>0.001</b> |
| Policy: PluralIgnorance  | 0.014    | 0.0006 | 24.270   | < <b>0.001</b> |
| Policy: CollectAction    | 0.013    | 0.0005 | 23.550   | < <b>0.001</b> |
| Policy: FutureSelfCont   | 0.013    | 0.0006 | 22.370   | < <b>0.001</b> |
| Policy: WorkTogetherNorm | 0.012    | 0.0006 | 20.590   | < <b>0.001</b> |
| Policy: LetterFutureGen  | 0.011    | 0.0006 | 20.000   | < <b>0.001</b> |
| Policy: NegativeEmotions | 0.011    | 0.0006 | 19.880   | < <b>0.001</b> |
| Policy: PsychDistance    | 0.011    | 0.0006 | 19.200   | < <b>0.001</b> |

**Table S18:** Coefficient table for an ordinal mixed effects model with climate action (i.e., number of trees planted in the WEPT) as the dependent variable, willingness to share information in each condition as the fixed effect, including country random effects.

| Sharing: Intervention   | Estimate | SE     | <i>z-value</i> | <i>p</i>       |
|-------------------------|----------|--------|----------------|----------------|
| Share: DynamicNorm      | 0.471    | 0.0454 | 10.390         | < <b>0.001</b> |
| Share: BindingMoral     | 0.466    | 0.0460 | 10.133         | < <b>0.001</b> |
| Share: SciConsens       | 0.422    | 0.0454 | 9.296          | < <b>0.001</b> |
| Share: Control          | 0.439    | 0.0475 | 9.242          | < <b>0.001</b> |
| Share: CollectAction    | 0.340    | 0.0442 | 7.678          | < <b>0.001</b> |
| Share: PluralIgnorance  | 0.357    | 0.0466 | 7.664          | < <b>0.001</b> |
| Share: SystemJust       | 0.326    | 0.0452 | 7.211          | < <b>0.001</b> |
| Share: FutureSelfCont   | 0.341    | 0.0493 | 6.913          | < <b>0.001</b> |
| Share: LetterFutureGen  | 0.243    | 0.0482 | 5.037          | < <b>0.001</b> |
| Share: WorkTogetherNorm | 0.218    | 0.0438 | 4.976          | < <b>0.001</b> |
| Share: PsychDistance    | 0.158    | 0.0459 | 3.438          | < <b>0.001</b> |
| Share: NegativeEmotions | 0.139    | 0.0430 | 3.239          | <b>0.001</b>   |

**Table S19:** Coefficient table from analysis of belief. Results are from a linear mixed effects model with climate beliefs as the dependent variable, condition as the fixed effect, along with total condition time as a covariate, including item (4 beliefs), participant, and country as random effects. Estimates are shown relative to the Control Condition.

| Intervention     | Estimate | SE     | <i>df</i> | <i>t</i> | <i>p</i>     |
|------------------|----------|--------|-----------|----------|--------------|
| (Intercept)      | 79.63    | 0.88   | 80.05     | 90.83    | < .001       |
| Condition Time   | 0.001    | 0.0002 | 59162.38  | 5.75     | < .001       |
| PsychDistance    | 3.08     | 0.47   | 59165.59  | 6.55     | < .001       |
| CollectAction    | 2.30     | 0.46   | 59165.43  | 5.01     | < .001       |
| SystemJust       | 1.90     | 0.46   | 59169.27  | 4.13     | < .001       |
| SciConsens       | 1.56     | 0.46   | 59168.19  | 3.40     | < .001       |
| FutureSelfCont   | 1.64     | 0.48   | 59175.38  | 3.39     | < .001       |
| LetterFutureGen  | 1.60     | 0.49   | 59169.22  | 3.26     | <b>0.001</b> |
| BindingMoral     | 1.43     | 0.46   | 59171.14  | 3.08     | <b>0.002</b> |
| PluralIgnorance  | 1.18     | 0.46   | 59160.52  | 2.56     | <b>0.010</b> |
| DynamicNorm      | 1.00     | 0.46   | 59183.66  | 2.17     | <b>0.030</b> |
| NegativeEmotions | 0.73     | 0.46   | 59166.27  | 1.58     | 0.114        |
| WorkTogetherNorm | -0.55    | 0.46   | 59159.98  | -1.21    | 0.227        |

**Table S20:** Coefficient table from analysis of policy support. Results are from a linear mixed effects model with climate policy support, as the dependent variable, condition as the fixed effect, along with total condition time as a covariate, including item (9 policies), participant, and country as random effects. Estimates are shown relative to the Control Condition.

| Intervention     | Estimate | SE     | <i>df</i> | <i>t</i> | <i>p</i>     |
|------------------|----------|--------|-----------|----------|--------------|
| (Intercept)      | 70.00    | 4.02   | 8.54      | 17.40    | < .001       |
| Condition Time   | 0.0008   | 0.0002 | 58259.82  | 4.64     | < .001       |
| CollectAction    | 2.92     | 0.37   | 58565.25  | 7.80     | < .001       |
| LetterFutureGen  | 2.62     | 0.40   | 58598.20  | 6.52     | < .001       |
| FutureSelfCont   | 1.96     | 0.40   | 58596.07  | 4.94     | < .001       |
| DynamicNorm      | 1.30     | 0.38   | 58596.74  | 3.45     | < .001       |
| PsychDistance    | 1.24     | 0.38   | 58642.02  | 3.24     | <b>0.001</b> |
| SystemJust       | 1.04     | 0.38   | 58566.00  | 2.76     | <b>0.006</b> |
| SciConsens       | 1.00     | 0.38   | 58602.11  | 2.67     | <b>0.008</b> |
| BindingMoral     | 0.94     | 0.38   | 58574.93  | 2.48     | <b>0.013</b> |
| PluralIgnorance  | 0.50     | 0.38   | 58573.00  | 1.32     | 0.188        |
| WorkTogetherNorm | -0.05    | 0.37   | 58620.33  | -0.14    | 0.890        |
| NegativeEmotions | -0.27    | 0.37   | 58575.42  | -0.72    | 0.474        |

**Table S21:** Coefficient table from analysis of Social Media Sharing. Results are from logistic mixed effects model with social media sharing as the dependent variable, condition as the fixed effect, along with total condition time as a covariate, including country as random effects. Estimates are shown relative to Control.

| Intervention     | Estimate | SE      | <i>z</i> | <i>p</i> |
|------------------|----------|---------|----------|----------|
| (Intercept)      | 0.07     | 0.15    | 0.50     | 0.620    |
| Condition Time   | 0.000007 | 0.00003 | 0.24     | 0.812    |
| NegativeEmotions | 0.48     | 0.05    | 9.43     | < .001   |
| CollectAction    | 0.40     | 0.05    | 7.76     | < .001   |
| LetterFutureGen  | 0.39     | 0.05    | 7.17     | < .001   |
| PsychDistance    | 0.35     | 0.05    | 6.61     | < .001   |
| DynamicNorm      | 0.31     | 0.05    | 6.11     | < .001   |
| FutureSelfCont   | 0.31     | 0.05    | 5.79     | < .001   |
| WorkTogetherNorm | 0.23     | 0.05    | 4.66     | < .001   |
| SystemJust       | 0.23     | 0.05    | 4.61     | < .001   |
| BindingMoral     | 0.19     | 0.05    | 3.80     | < .001   |
| SciConsens       | 0.18     | 0.05    | 3.65     | < .001   |
| PluralIgnorance  | 0.10     | 0.05    | 1.92     | 0.055    |



**Table S22:** Coefficient table from analysis of WEPT. Results are from an ordinal mixed effects model with climate action (WEPT), as the dependent variable, condition as the fixed effect, along with intervention time as a covariate, including country as random effects. Estimates are shown relative to the Control Condition.

| Intervention     | Estimate | SE    | <i>z</i> | <i>p</i>     |
|------------------|----------|-------|----------|--------------|
| Condition Time   | 0.001    | 0.000 | 18.88    | < .001       |
| BindingMoral     | 0.27     | 0.04  | 6.20     | < .001       |
| SciConsens       | 0.25     | 0.04  | 5.67     | < .001       |
| DynamicNorm      | 0.19     | 0.04  | 4.35     | < .001       |
| PluralIgnorance  | 0.12     | 0.04  | 2.86     | <b>0.004</b> |
| SystemJust       | 0.09     | 0.04  | 2.13     | <b>0.033</b> |
| CollectAction    | -0.06    | 0.04  | -1.52    | 0.129        |
| WorkTogetherNorm | -0.18    | 0.04  | -4.30    | < .001       |
| FutureSelfCont   | -0.19    | 0.04  | -4.31    | < .001       |
| NegativeEmotions | -0.29    | 0.04  | -7.01    | < .001       |
| PsychDistance    | -0.34    | 0.04  | -8.30    | < .001       |
| LetterFutureGen  | -0.38    | 0.04  | -8.79    | < .001       |

**Table S23:** Coefficient table from analysis of WEPT. Results are from an ordinal mixed effects model with climate action (WEPT), as the dependent variable, condition by condition time interaction as fixed effects, including country as random effects. Estimates are shown relative to the Control Condition.

| Fixed Effect                   | Estimate | SE    | <i>z</i> | <i>p</i>     |
|--------------------------------|----------|-------|----------|--------------|
| Condition Time                 | 0.002    | 0.000 | 8.572    | < .001       |
| SciConsens                     | 0.448    | 0.076 | 5.892    | < .001       |
| DynamicNorm                    | 0.418    | 0.077 | 5.447    | < .001       |
| PluralIgnorance                | 0.396    | 0.075 | 5.248    | < .001       |
| SystemJust                     | 0.364    | 0.077 | 4.732    | < .001       |
| CollectAction                  | 0.192    | 0.079 | 2.442    | <b>0.015</b> |
| WorkTogetherNorm               | 0.179    | 0.079 | 2.269    | <b>0.023</b> |
| FutureSelfCont                 | 0.151    | 0.081 | 1.870    | <b>0.061</b> |
| NegativeEmotions               | 0.050    | 0.079 | 0.626    | .531         |
| LetterFutureGen                | -0.029   | 0.085 | -0.341   | .733         |
| PsychDistance                  | -0.104   | 0.083 | -1.262   | .207         |
| BindingMoral                   | -0.646   | 0.076 | -8.501   | < .001       |
| BindingMoral:Condition Time    | 0.753    | 0.021 | 35.598   | < .001       |
| SciConsens:Condition Time      | 0.003    | 0.001 | 2.260    | <b>.024</b>  |
| DynamicNorm:Condition Time     | -0.001   | 0.000 | -1.269   | .204         |
| PluralIgnorance:Condition Time | -0.001   | 0.000 | -2.562   | <b>.010</b>  |
| SystemJust:Condition Time      | -0.001   | 0.000 | -3.572   | < .001       |
| CollectAction:Condition Time   | -0.001   | 0.000 | -3.800   | < .001       |
| PsychDistance:Condition Time   | -0.001   | 0.000 | -4.072   | < .001       |
| LetterFutureGen:Condition Time | -0.001   | 0.000 | -5.235   | < .001       |

|                                 |        |       |        |        |
|---------------------------------|--------|-------|--------|--------|
| NegativeEmotions:Condition Time | -0.001 | 0.000 | -5.246 | < .001 |
| FutureSelfCont:Condition Time   | -0.001 | 0.000 | -5.254 | < .001 |
| WorkTogetherNorm:Condition Time | -0.002 | 0.000 | -5.594 | < .001 |

**Table S24:** Coefficient table from analysis of WEPT. Results are from an ordinal mixed effects model with climate action (WEPT) as the dependent variable (coded as completed numbers of pages scored at least as 80% accurate), condition as the fixed effect, including country as random effects. Estimates are shown relative to the Control Condition.

| Intervention     | Estimate | SE   | <i>z</i> | <i>p</i>         |
|------------------|----------|------|----------|------------------|
| BindingMoral     | 0.03     | 0.04 | 0.89     | 0.375            |
| SciConsens       | 0.02     | 0.04 | 0.65     | 0.513            |
| DynamicNorm      | 0.01     | 0.04 | 0.25     | 0.800            |
| SystemJust       | -0.05    | 0.04 | -1.39    | 0.163            |
| PluralIgnorance  | -0.07    | 0.04 | -1.82    | 0.068            |
| CollectAction    | -0.11    | 0.04 | -3.02    | <b>0.003</b>     |
| FutureSelfCont   | -0.12    | 0.04 | -3.04    | <b>0.002</b>     |
| LetterFutureGen  | -0.23    | 0.04 | -5.67    | <b>&lt; .001</b> |
| WorkTogetherNorm | -0.25    | 0.04 | -6.61    | <b>&lt; .001</b> |
| PsychDistance    | -0.27    | 0.04 | -7.11    | <b>&lt; .001</b> |
| NegativeEmotions | -0.29    | 0.04 | -7.67    | <b>&lt; .001</b> |

**Table S25:** To test whether there was a main effect of condition (for each outcome variable), we conducted a Wald test for each outcome. The Wald test evaluated the null hypothesis that the joint distribution of the estimated coefficients for all intervention conditions was the same as the estimated coefficient for the control condition. The p-values below 0.001 for all tested outcomes indicate a significant divergence of the joint distribution of estimated coefficients from that of the control, suggesting that the interventions had varying effects.

| Outcome              | W - statistics | df | <i>p</i>       |
|----------------------|----------------|----|----------------|
| Belief               | 160.99         | 11 | < <b>0.001</b> |
| Policy Support       | 105.10         | 11 | < <b>0.001</b> |
| Social Media Sharing | 154.26         | 11 | < <b>0.001</b> |
| WEPT                 | 227.89         | 11 | < <b>0.001</b> |
